# Supplementary material for: Smart bio-gel optofluidic Mach–Zehnder interferometers multiphoton-lithographically customized with chemo-mechanical-opto transduction and bio-triggered degradation
Source: Royal Society of Chemistry journal article supplement (doi:10.1039/d0lc00718h), 2020-01-01
Supplement: d0lc00718h1.pdf [file d0lc00718h1.pdf]

1     **Smart Bio-gel Optofluidic Mach-Zehnder Interferometers Multiphoton-**  
2     **lithographically Customized with Chemo-mechanical-opto Transduction**  
3     **and Bio-triggered Degradation**

4             Zhi-Shan Hou,<sup>a</sup> Yun-Lu Sun,<sup>\*b</sup> Qi-Song Li,<sup>\*c</sup> Xudong Fan,<sup>b</sup> and Rong Cheng<sup>\*d</sup>

5  
6     <sup>a</sup>State Key Laboratory of Precision Measurement Technology and Instruments, Department of Precision Instrument,  
7     Tsinghua University, Haidian, Beijing 100084, China.

8     <sup>b</sup>Department of Biomedical Engineering, University of Michigan, 1101 Beal Ave., Ann Arbor, MI 48109, USA.

9     <sup>c</sup>Key Laboratory of Materials for High Power Laser, Shanghai Institute of Optics and Fine Mechanics, Chinese Academy of  
10     Sciences, Shanghai 201800, China.

11     <sup>d</sup>Department of Mechanical Engineering, Tsinghua University, Haidian, Beijing 100084, China.

12     E-mail:                     yunlus@umich.edu;                     liqisong@siom.ac.cn;                     chengr@tsinghua.edu.cn

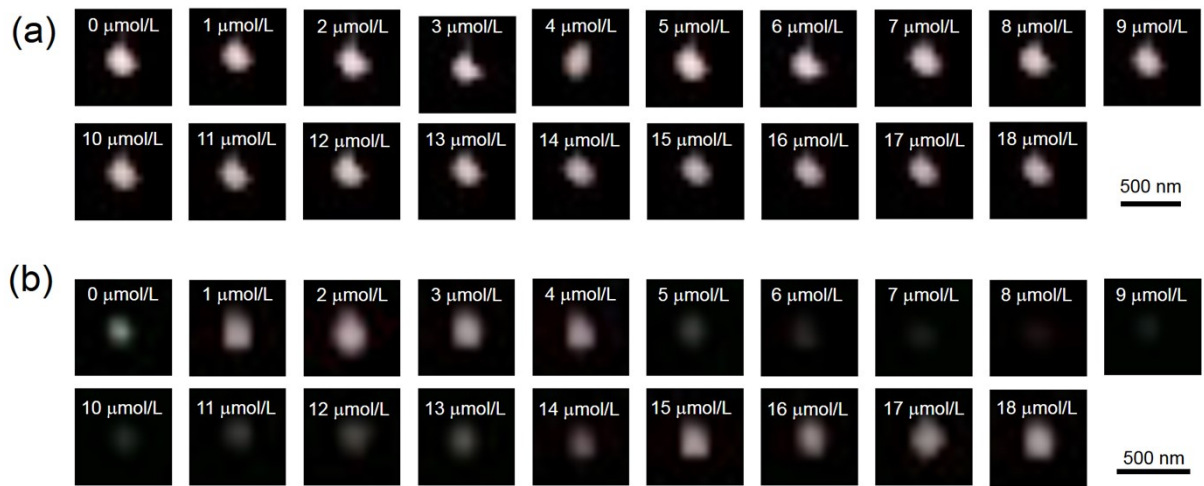

1  
 2 **Figure S1.** The output light intensity of the (a) P-MZIs and (b) unbalanced PMZI along with  
 3  $\text{Na}_2\text{SO}_4$  concentration.

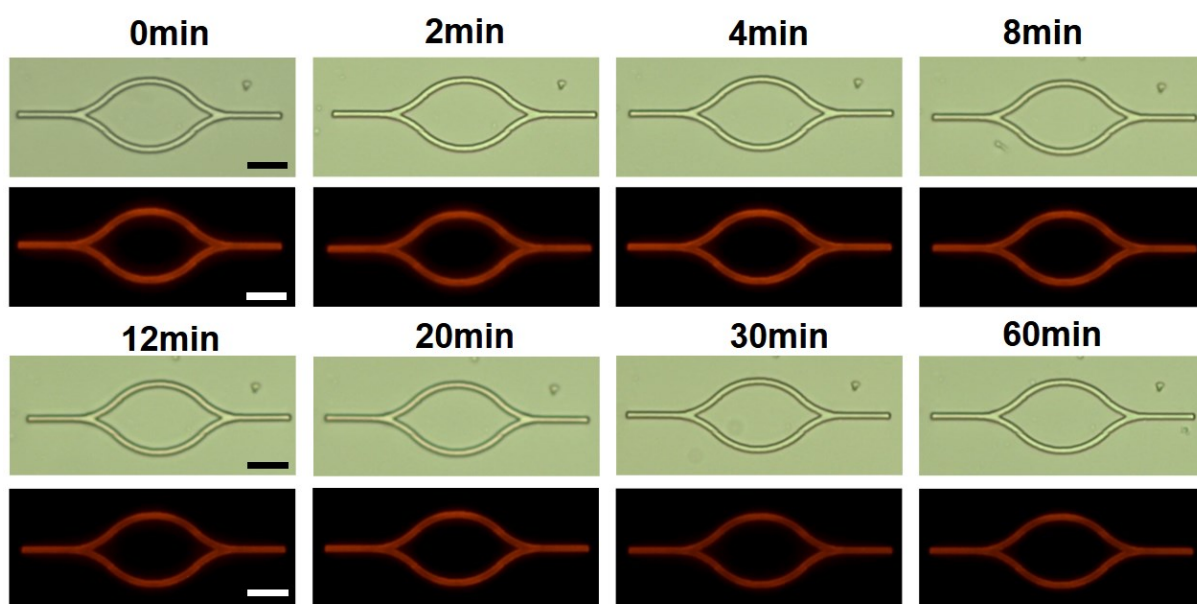

1

2 **Figure S2.** The protein-hydrogel in phosphate-buffered saline (PBS); (58°C) scale bars, 10  
3  $\mu\text{m}$ .

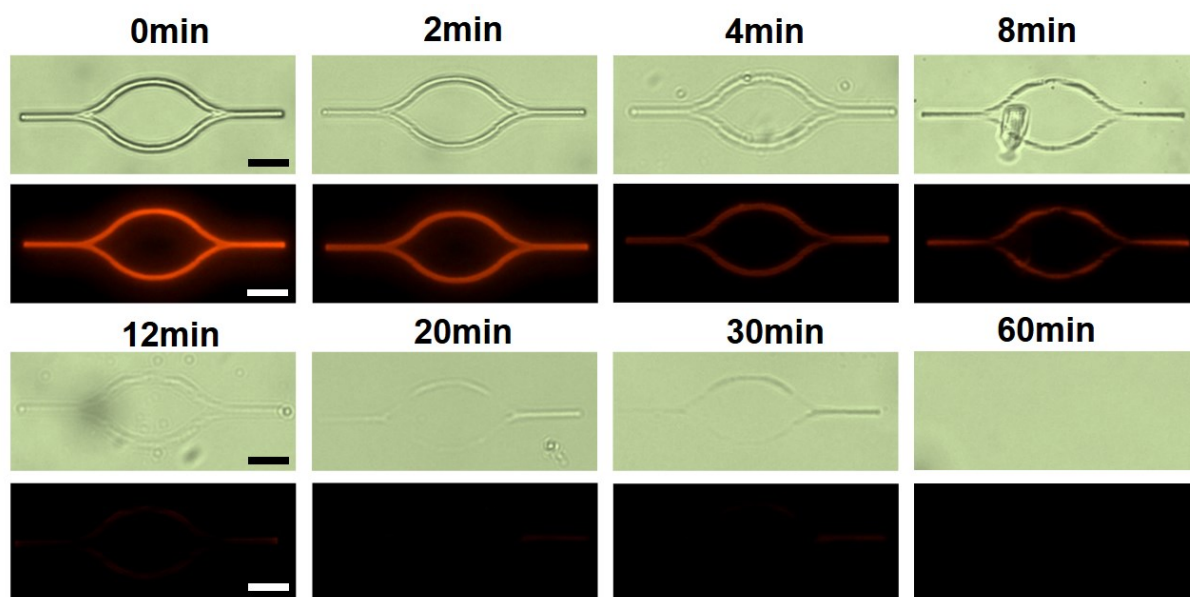

1  
2 **Figure S3.** The proteinase K digestion test with protein-hydrogel; (1 mg/ml, 58°C) scale bars,  
3 10  $\mu$ m.
